# Supplementary material for: Altering nuclear pore complex function impacts longevity and mitochondrial function in S. cerevisiae
Source: PubMed Central journal article supplement — J Cell Biol. 2015 Mar 16;208(6):729–44. doi: 10.1083/jcb.201412024 (PMC4362458; doi:10.1083/jcb.201412024), 2015-03-16
Supplement: supp_jcb.201412024_JCB_201412024_sm.pdf [file supp_jcb.201412024_JCB_201412024_sm.pdf]

Lord et al., <http://www.jcb.org/cgi/content/full/jcb.201412024/DC1>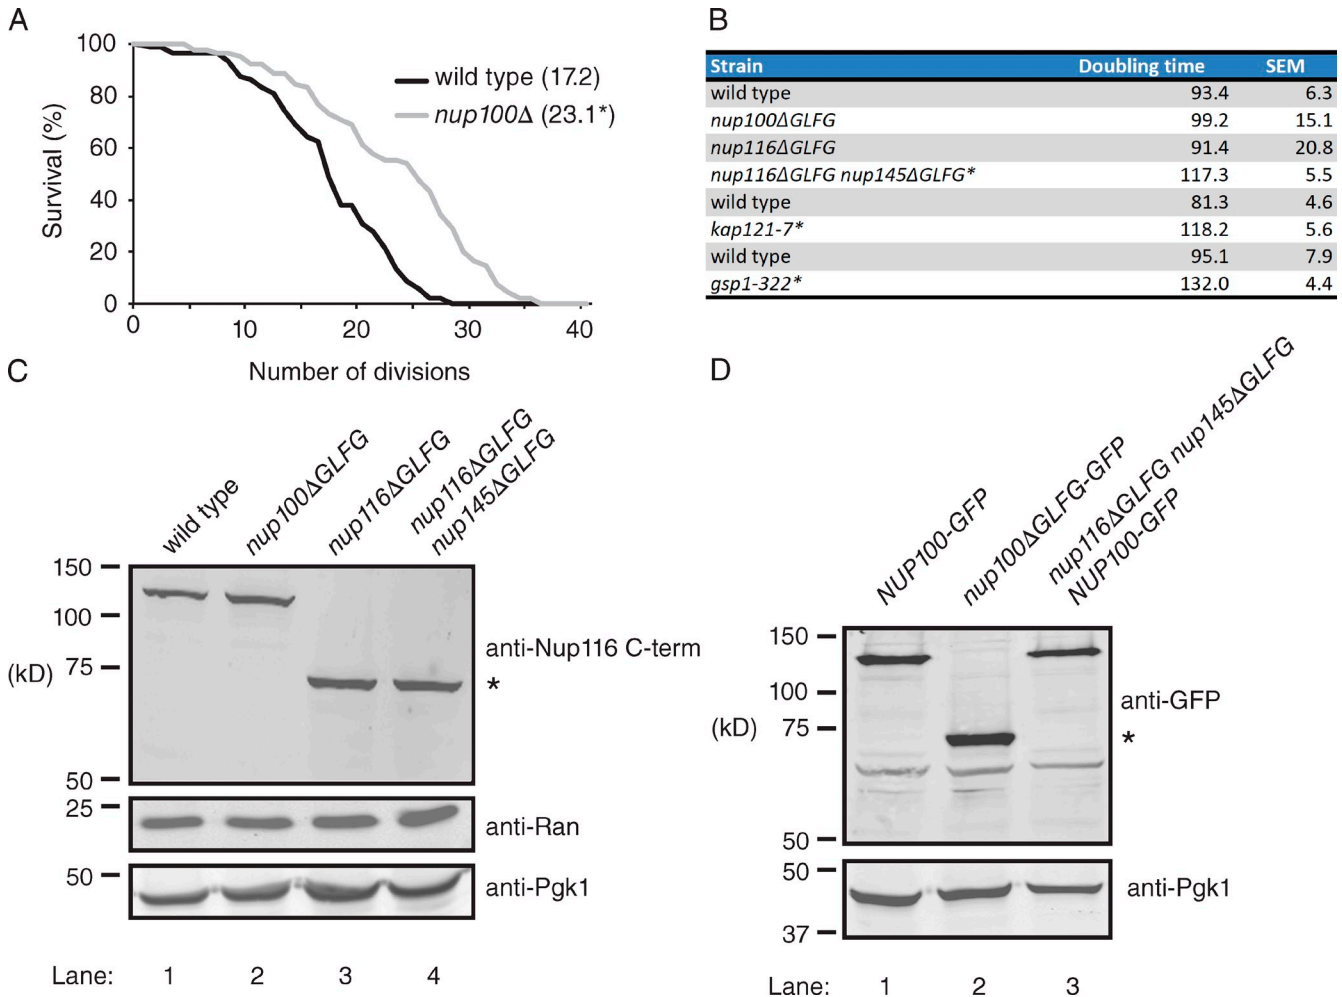

Figure S1. **Nup100 and Nup116 levels are not altered in  $\Delta FG$  strains.** (A) Survival curves for wild-type and *nup100* $\Delta$  BY4741 cells. The mean RLSs are listed next to each strain name; \*,  $P < 0.0001$  when the curve is compared with wild type using a log-rank test ( $n \geq 75$  cells). Mean RLSs are listed in parentheses. (B) Doubling times for the listed strains. Error bars represent SEM; \*,  $P < 0.05$  when compared with wild type using a two-tailed Student's *t* test. (C) Lysates from the listed strains were immunoblotted using anti-Ran, anti-Pgk1, and anti-Nup116 C-terminal antibodies. The asterisk is used to show the relative mobility of Nup116 $\Delta$ GLFG. (D) Lysates from the listed *NUP100-GFP::HIS3* strains were immunoblotted using anti-Pgk1 and anti-GFP C-terminal antibodies. The asterisk is used to show the relative mobility of Nup100 $\Delta$ GLFG-GFP.

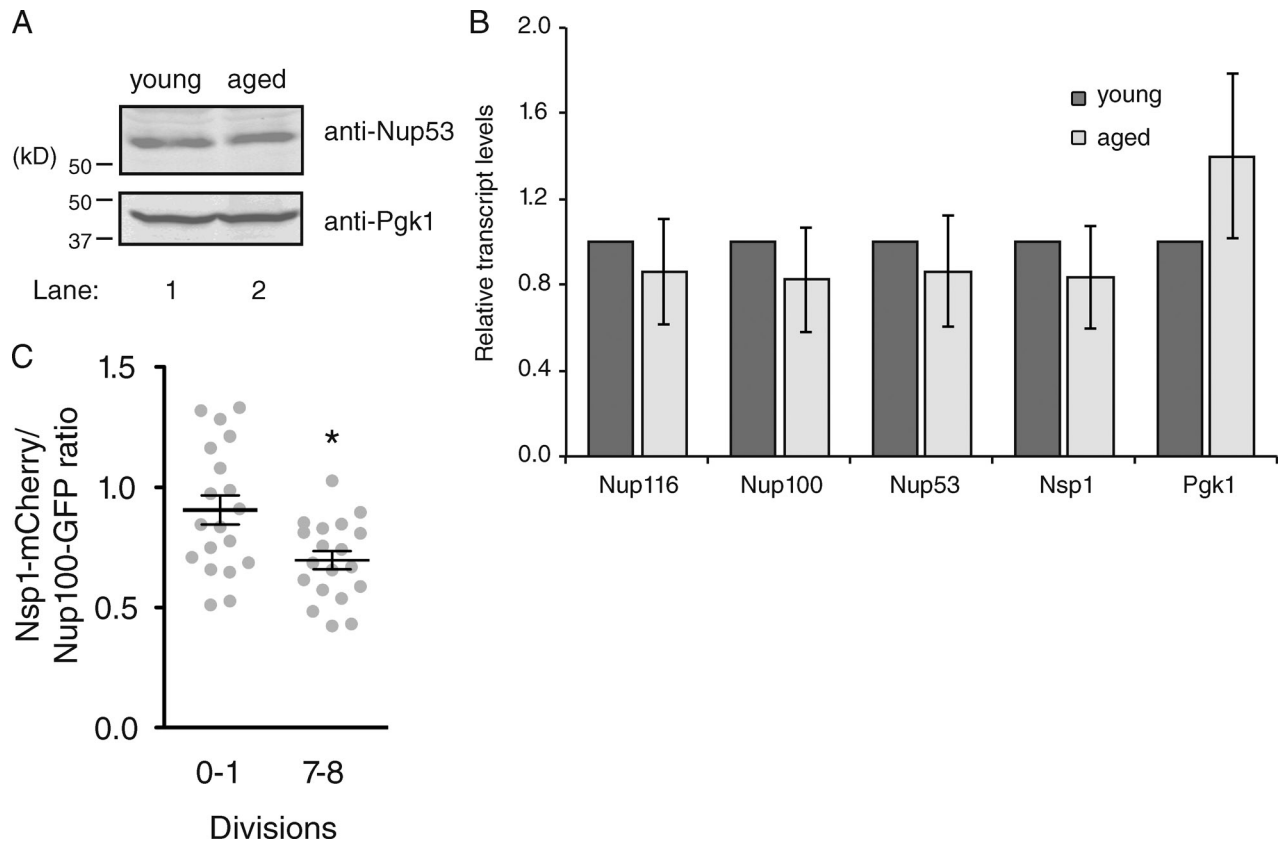

Figure S2. **NPCs are altered during replicative aging.** (A) Enriched mother (~6–9 divisions) and young (~0–1 divisions) wild-type cells were lysed, and immunoblotting was conducted using anti-Nup53 and anti-Pgk1. (B) Relative levels of the listed transcripts were measured by quantitative RT-PCR using RNA derived from young (~0–1 divisions) or enriched mothers (~6–9 divisions). Error bars represent SEM from three independent experiments, each of which had three replicates per transcript. (C) Relative levels of Nup100-GFP and Nsp1-mCherry fluorescence at the nuclear rim in 0–1 or 7–8 division cells. \*,  $P < 0.04$  when the datasets were compared using a two-tailed Student's *t* test ( $n \geq 20$  cells throughout three separate experiments). Error bars represent SEM.

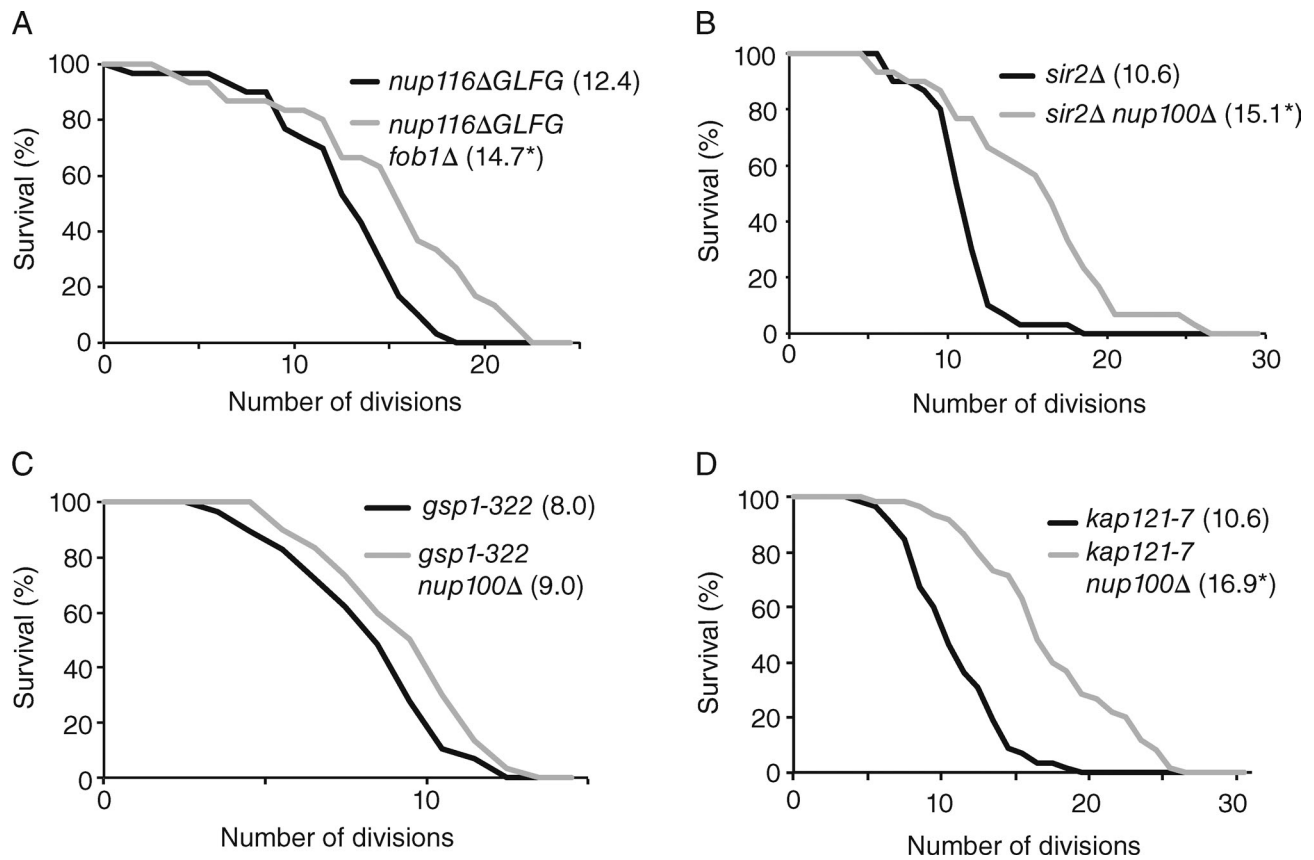

Figure S3. **Epistasis analysis of NPC mutants.** (A and B) RLSs for the listed strains were measured at 30°C on glucose plates. \*,  $P < 0.05$  when the curves on the same graph are compared using a log-rank test with  $n \geq 30$  cells. (C) Survival curves for *gsp1-322* and *gsp1-322 nup100Δ* mutants. (D) Survival curves for *kap121-7* and *nup100Δ kap121-7* cells were determined on 0.1 M KCl plates at 30°C; \*,  $P < 0.05$  when curves were compared using a log-rank test ( $n \geq 30$  cells). Mean RLSs are listed in parentheses.

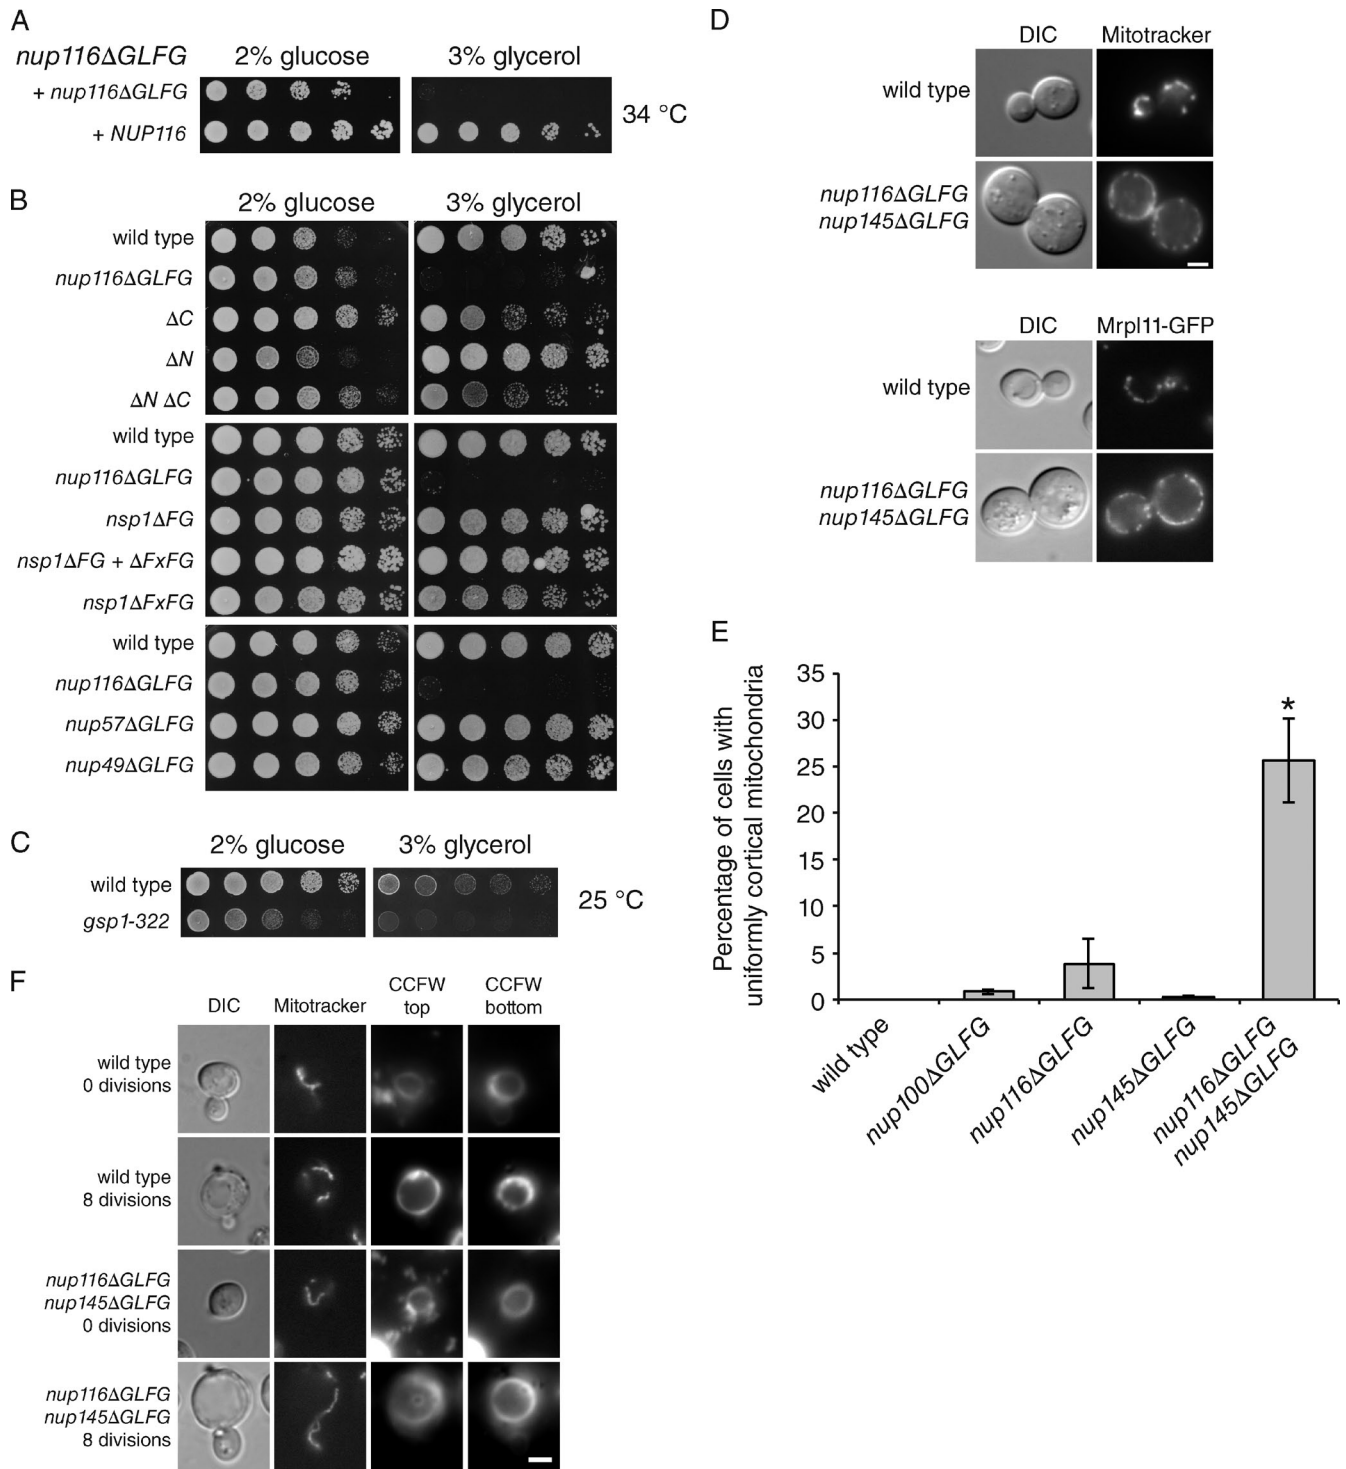

Figure S4. **Mitochondrial function is regulated by NUP116.** (A) *nup116ΔGLFG* cells were transformed with pRS314 vectors containing *nup116ΔGLFG* or *NUP116*. The strains were then serially diluted onto SC-Trp glucose or glycerol and incubated at 34°C until grown as shown. (B) The listed  $\Delta FG$  strains were serially diluted on glucose or glycerol and incubated at 37°C until grown as shown. The  $\Delta C$  strain lacks FG regions of the cytoplasmic-facing Nup42 and Nup159, the  $\Delta N$  strain lacks FG regions of the nuclear-oriented Nup1, Nup2, and Nup60, and the  $\Delta N \Delta C$  strain combines these mutations. (C) Wild-type or *gsp1-322* cells were serially diluted onto glucose or glycerol and incubated at 25°C until grown as shown. (D) Single wild-type or *nup116ΔGLFG nup145ΔGLFG* cells stained using MitoTracker red CMXRos (top) or expressing endogenously tagged Mrp111-GFP (bottom) were visualized using fluorescence microscopy at 25°C. Bar, 2.5  $\mu$ m. (E) Quantification of the percentage of cells exhibiting a uniformly cortical mitochondrial localization when stained with MitoTracker red CMXRos at 25°C. \*,  $P < 0.05$  when compared with wild-type cells using Student's *t* test; error bars represent SEM for three independent experiments ( $n \geq 100$  cells per experiment). (F) Representative images of zero or eight division Mrp111-GFP cells stained with CCFW and visualized using fluorescence microscopy. CCFW images show the top and bottom of cells for visualization of most bud scars. DIC, differential interference contrast. Bar, 2.5  $\mu$ m.

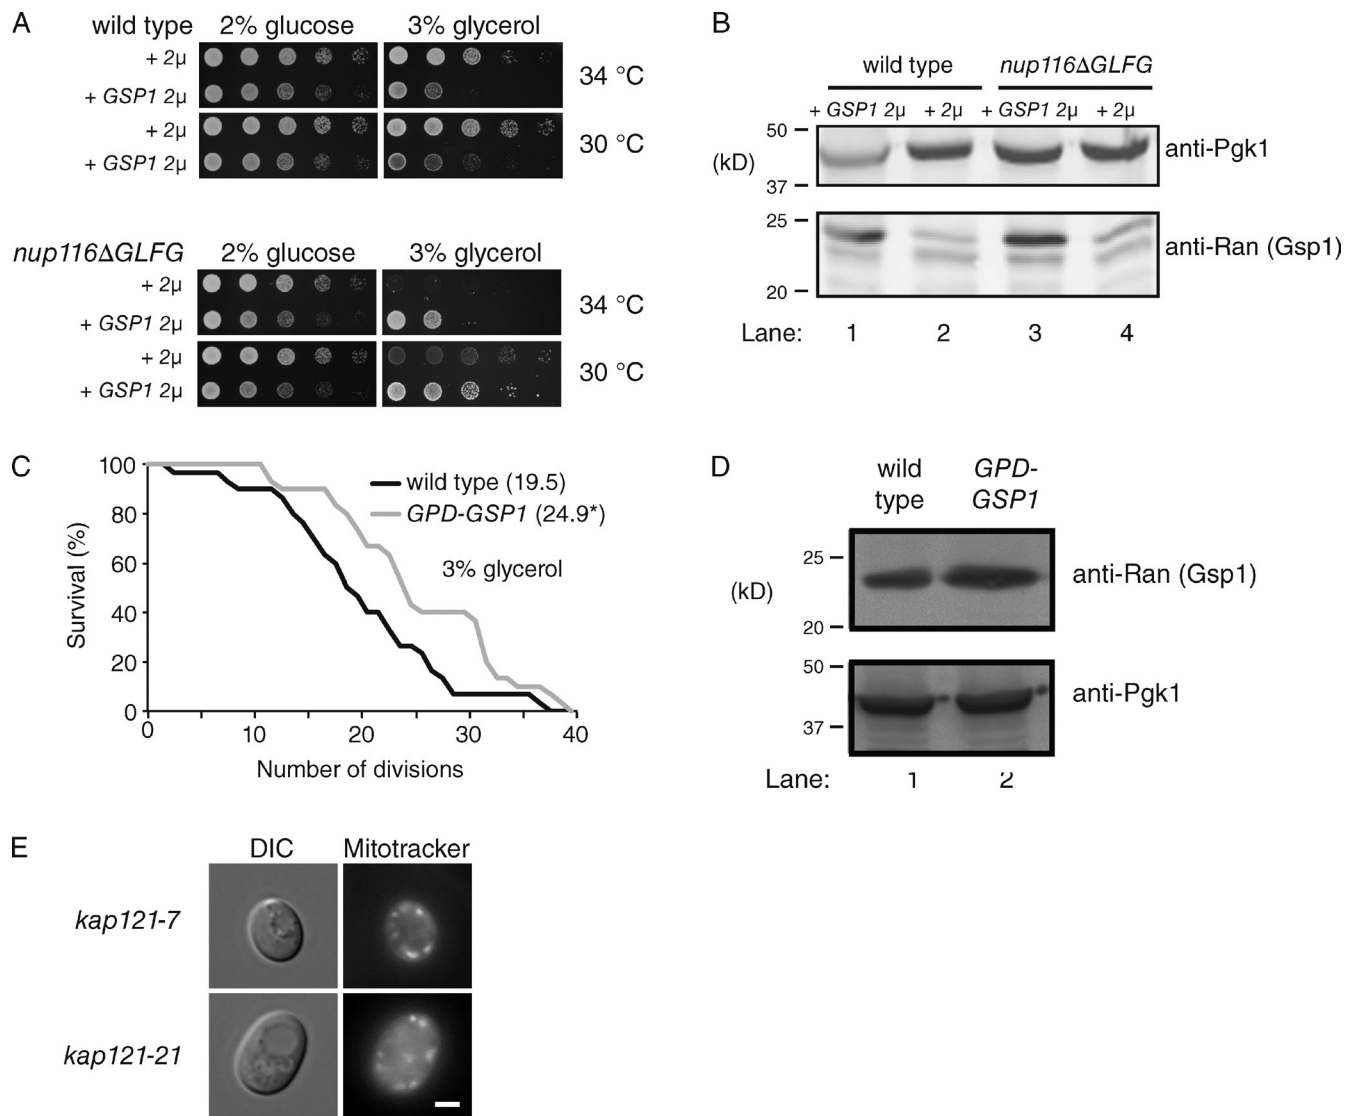

Figure S5. **Ran and Kap121 are required for RLS.** (A) Wild-type and *nup116 $\Delta$ GLFG* cells transformed with an empty 2 $\mu$  vector or a 2 $\mu$  vector containing *GSP1* were serially diluted onto glucose or glycerol at 30 and 34°C until grown as shown. (B) Lysates of strains in A were immunoblotted using anti-Pgk1 and anti-mouse Ran antibodies. Anti-mouse Ran is able to detect yeast Gsp1 as a result of the high identity (80%) between these proteins. (C) Survival curves for the listed strains were determined on glycerol plates at 30°C. \*,  $P < 0.02$  when the curves are compared using a log-rank test with  $n = 30$  cells. (D) Lysates from the strains in C were immunoblotted with anti-mouse Ran and anti-Pgk1. (E) *kap121-7* and *kap121-21* cells stained with MitoTracker red CMXRos were visualized using fluorescence microscopy. Brightness and contrast settings were adjusted on images shown in Fig. 6 B using ImageJ to better visualize MitoTracker signal. DIC, differential interference contrast. Bar, 2.5  $\mu$ m.

Table S1. Yeast strains used in this study

| Strain                                                                        | Genotype                                                                                                                                                                                                                                                                                                                                                                                                                                                             | Source                                                                                                                                        | Description                                                      |
|-------------------------------------------------------------------------------|----------------------------------------------------------------------------------------------------------------------------------------------------------------------------------------------------------------------------------------------------------------------------------------------------------------------------------------------------------------------------------------------------------------------------------------------------------------------|-----------------------------------------------------------------------------------------------------------------------------------------------|------------------------------------------------------------------|
| <i>arx1Δ</i><br>BY4741                                                        | <i>MATα his3Δ1 leu2Δ0 lys2Δ0 ura3Δ0 arx1Δ::KAN</i><br><i>MATα his3Δ1 leu2Δ0 met15Δ0 ura3Δ0</i>                                                                                                                                                                                                                                                                                                                                                                       | Giaever et al., 2002<br>Giaever et al., 2002                                                                                                  | Wild-type S288C strain used with deletion library strains        |
| <i>fob1Δ</i><br><i>kap123Δ</i><br><i>kap95-L63A</i><br>N43-6C-GSP1            | <i>MATα his3Δ1 leu2Δ0 met15Δ0 ura3Δ0 fob1Δ::KAN</i><br><i>MATα his3Δ1 leu2Δ0 met15Δ0 ura3Δ0 kap123Δ::KAN</i><br><i>MATα his3Δ1 leu2Δ0 met15Δ0 ura3Δ0 kap95-L63A</i><br><i>MATα gsp1Δ::HIS3::GSP1::LEU2 ade2 leu2 trp1 ura3</i>                                                                                                                                                                                                                                       | Giaever et al., 2002<br>Giaever et al., 2002<br>Okie et al., 1998                                                                             | BY4741 background<br>Wild-type strain for <i>gsp1-322</i> mutant |
| N43-6c-gsp1-322<br>Nsp1-GFP<br><i>nup100Δ</i><br>PSY1213<br>PSY1214<br>PSY580 | <i>MATα gsp1Δ::HIS3::gsp1-322::LEU2 ade2 leu2 trp1 ura3</i><br><i>MATα nsp1-GFP:HIS3 his3Δ0 leu2Δ0 met15Δ0 ura3Δ0</i><br><i>MATα his3Δ1 leu2Δ0 lys2Δ0 ura3Δ0 nup100Δ::KAN</i><br><i>MATα pse1-7 (kap121-7) ura3-52 trp1Δ63 leu2Δ1</i><br><i>MATα pse1-21 (kap121-21) ura3-52 trp1Δ63 leu2Δ1</i><br><i>MATα ura3-52 trp1Δ63 leu2Δ1</i>                                                                                                                                | Okie et al., 1998<br>Huh et al., 2003<br>Giaever et al., 2002<br>Seedorf and Silver, 1997<br>Seedorf and Silver, 1997<br>Winston et al., 1995 | Wild-type strain for PSY1213 and 1214                            |
| <i>rpl23aΔ</i><br>SWY127<br>SWY2284                                           | <i>MATα his3Δ1 leu2Δ0 lys2Δ0 ura3Δ0 rpl23aΔ::KAN</i><br><i>MATα nup116-5::HIS3 ade2-1 ura3-1 his3-11,15 trp1-1 leu2-3,112 can1-100 +pSW131</i><br><i>MATα ura3-1 his3-11,15 trp1-1 leu2-3,112</i>                                                                                                                                                                                                                                                                    | Giaever et al., 2002<br>Iovine et al., 1995<br>Strawn et al., 2004                                                                            | Wild-type W303 strain used with ΔFG mutants                      |
| SWY2708<br>SWY2724<br>SWY2734                                                 | <i>MATα trp1-1 ura3-1 leu2-3,112 his3-11,15 HA-LoxP-nup49ΔGLFG</i><br><i>MATα lys2 ura3-1 leu2-3,112 his3-11,15 HA-LoxP-nsp1ΔFXFG</i><br><i>MATα trp1-1 ura3-1 leu2-3,112 his3-11,15 HA-LoxP-nup42ΔFG myc-LoxP-nup159ΔFG</i>                                                                                                                                                                                                                                         | Strawn et al., 2004<br>Strawn et al., 2004<br>Strawn et al., 2004                                                                             |                                                                  |
| SWY2752<br>SWY2762<br>SWY2791<br>SWY2813<br>SWY2867<br>SWY2896                | <i>MATα trp1-1 ura3-1 leu2-3,112 his3-11,15 myc-LoxP-nup57ΔGLFG</i><br><i>MATα trp1-1 ura3-1 leu2-3,112 his3-11,15 HA-LoxP-nup100ΔGLFG</i><br><i>MATα trp1-1 ura3-1 leu2-3,112 his3-11,15 T7-LoxP-nup116ΔGLFG</i><br><i>MATα lys2 ura3-1 leu2-3,112 his3-11,15 Flag-LoxP-nsp1ΔFG</i><br><i>MATα lys2 ura3-1 leu2-3,112 his3-11,15 myc-LoxP-nup145ΔGLFG</i><br><i>MATα lys2 ura3-1 leu2-3,112 his3-11,15 myc-LoxP-nup2ΔFXFG T7-LoxP-nup1ΔFXFG myc-LoxP-nup60ΔFXFG</i> | Strawn et al., 2004<br>Strawn et al., 2004        |                                                                  |
| SWY2916<br>SWY2919<br>SWY2971                                                 | <i>MATα trp1-1 ura3-1 leu2-3,112 his3-11,15 myc-LoxP-nup145ΔGLFG T7-LoxP-nup116ΔGLFG</i><br><i>MATα lys2 ura3-1 leu2-3,112 his3-11,15 Flag-LoxP-nsp1ΔFXFG-ΔFG</i><br><i>MATα trp1-1 ura3-1 leu2-3,112 his3-11,15 HA-LoxP-nup42ΔFG myc-LoxP-nup159ΔFG T7-LoxP-nup1ΔFXFG myc-LoxP-nup2ΔFXFG myc-LoxP-nup60ΔFXFG</i>                                                                                                                                                    | Strawn et al., 2004<br>Strawn et al., 2004<br>Strawn et al., 2004                                                                             |                                                                  |
| SWY2973                                                                       | <i>MATα ura3-1 leu2-3,112 his3-11,15 HA-LoxP-nup100ΔGLFG myc-LoxP-nup145ΔGLFG</i>                                                                                                                                                                                                                                                                                                                                                                                    | Strawn et al., 2004                                                                                                                           |                                                                  |
| SWY4232<br>SWY5678<br>SWY5680                                                 | <i>MATα lys2 ura3-1 leu2-3,112 his3-11,15 nup100Δ::KAN</i><br><i>MATα ura3-1 his3-11,15 leu2-3,112 lys2 htb2-mCherry:HIS3</i><br><i>MATα ura3-1 his3-11,15 leu2-3,112 lys2 T7-LoxP-nup116ΔGLFG htb2-mCherry:HIS3</i>                                                                                                                                                                                                                                                 | This study<br>This study<br>This study                                                                                                        |                                                                  |
| SWY5724<br>SWY5725                                                            | <i>MATα ura3-1 his3-11,15 trp1-1 leu2-3,112 nup188Δ::KAN</i><br><i>MATα ura3-1 his3-11,15 trp1-1 leu2-3,112 nup188Δ::KAN htb2-mCherry:HIS3</i>                                                                                                                                                                                                                                                                                                                       | This study<br>This study                                                                                                                      |                                                                  |
| SWY5728                                                                       | <i>MATα trp1-1 ura3-1 leu2-3,112 his3-11,15 HA-LoxP-nup100ΔGLFG htb2-mCherry:HIS3</i>                                                                                                                                                                                                                                                                                                                                                                                | This study                                                                                                                                    |                                                                  |
| SWY5836<br>SWY5837                                                            | <i>MATα ura3-1 his3-11,15 trp1-1 leu2-3,112 mrp111-GFP:HIS3</i><br><i>MATα trp1-1 ura3-1 leu2-3,112 his3-11,15 HA-LoxP-nup100ΔGLFG mrp111-GFP:HIS3</i>                                                                                                                                                                                                                                                                                                               | This study<br>This study                                                                                                                      |                                                                  |
| SWY5838                                                                       | <i>MATα trp1-1 ura3-1 leu2-3,112 his3-11,15 T7-LoxP-nup116ΔGLFG mrp111-GFP:HIS3</i>                                                                                                                                                                                                                                                                                                                                                                                  | This study                                                                                                                                    |                                                                  |
| SWY5839                                                                       | <i>MATα lys2 ura3-1 leu2-3,112 his3-11,15 myc-LoxP-nup145ΔGLFG mrp111-GFP:HIS3</i>                                                                                                                                                                                                                                                                                                                                                                                   | This study                                                                                                                                    |                                                                  |
| SWY5840                                                                       | <i>MATα trp1-1 ura3-1 leu2-3,112 his3-11,15 myc-LoxP-nup145ΔGLFG T7-LoxP-nup116ΔGLFG mrp111-GFP:HIS3</i>                                                                                                                                                                                                                                                                                                                                                             | This study                                                                                                                                    |                                                                  |
| SWY5874                                                                       | <i>MATα trp1-1 ura3-1 leu2-3,112 his3-11,15 myc-LoxP-nup145ΔLFG T7-LoxP-nup116ΔGLFG htb2-mCherry:HIS3</i>                                                                                                                                                                                                                                                                                                                                                            | This study                                                                                                                                    |                                                                  |
| SWY5909                                                                       | <i>MATα trp1-1 ura3-1 leu2-3,112 his3-11,15 myc-LoxP-nup145ΔGLFG T7-LoxP-nup116ΔGLFG sir2Δ::KAN</i>                                                                                                                                                                                                                                                                                                                                                                  | This study                                                                                                                                    |                                                                  |

Table S1. Yeast strains used in this study (Continued)

| Strain  | Genotype                                                                                                 | Source     | Description       |
|---------|----------------------------------------------------------------------------------------------------------|------------|-------------------|
| SWY5912 | <i>his3Δ 1 leu2Δ 0 ura3Δ 0 fob1Δ::KAN nup100Δ::KAN</i>                                                   | This study | BY4741 background |
| SWY5913 | <i>MATα ura3-1 his3-11,15 trp1-1 leu2-3,112 nup100-GFP:HIS3</i>                                          | This study |                   |
| SWY5914 | <i>MATα trp1-1 ura3-1 leu2-3,112 his3-11,15 HA-LoxP-nup100ΔGLFG-GFP:HIS3</i>                             | This study |                   |
| SWY5915 | <i>MATα trp1-1 ura3-1 leu2-3,112 his3-11,15 myc-LoxP-nup145ΔGLFG T7-LoxP-nup116ΔGLFG nup100-GFP:HIS3</i> | This study |                   |
| SWY6012 | <i>MATα pse1-7 (kap121-7) ura3-52 trp1Δ63 leu2Δ 1 flo11Δ::KAN</i>                                        | This study |                   |
| SWY6013 | <i>MATα pse1-21 (kap121-21) ura3-52 trp1Δ63 leu2Δ 1 flo11Δ::KAN</i>                                      | This study |                   |
| SWY6014 | <i>MATα ura3-52 trp1Δ63 leu2Δ 1 flo11Δ::KAN</i>                                                          | This study |                   |
| SWY6044 | <i>MATα ura3-1 his3-11,15 trp1-1 leu2-3,112 sir2Δ::KAN</i>                                               | This study |                   |
| SWY6169 | <i>MATα his3Δ 1 leu2Δ 0 met15Δ 0 ura3Δ 0 GPD-GSP1:URA3</i>                                               | This study | BY4741 background |
| SWY6170 | <i>MATα ura3-1 his3-11,15 trp1-1 leu2-3,112 sir2Δ::KAN nup100Δ::TRP1</i>                                 | This study |                   |
| SWY6236 | <i>MATα gsp1Δ::HIS3::gsp1-322::LEU2 ade2 leu2 trp1 ura3 nup100Δ::TRP1</i>                                | This study |                   |
| SWY6237 | <i>MATα pse1-7 (kap121-7) ura3-52 trp1Δ63 leu2Δ 1 nup100Δ::TRP1</i>                                      | This study |                   |
| SWY6238 | <i>MATα ura3-1 his3-11,15 trp1-1 leu2-3,112 nup100-GFP:HIS3 nsp1-mCherry:KAN</i>                         | This study |                   |
| SWY6239 | <i>nup116ΔGLFG fob1Δ::KAN</i>                                                                            | This study |                   |

A list of yeast strains as well as their origins. Descriptions are provided for some strains that provide context about their use.

Table S2. Plasmids used in this study

| Plasmid                       | Description                                                                                      | Source                  |
|-------------------------------|--------------------------------------------------------------------------------------------------|-------------------------|
| GFP-4PrA                      | GFP-4PrA cloned into pRS415 ( <i>LEU2 CEN</i> single copy) under <i>TP11</i> promoter            | This study              |
| pGAD-GFP                      | SV40 NLS fused to GFP cloned into a <i>LEU2 2μ</i> plasmid under <i>ADH1</i> promoter            | Shulga et al., 1996     |
| pRS426                        | <i>URA3 2μ</i> (multicopy) empty vector                                                          |                         |
| pSpo12 <sub>76-130</sub> -GFP | Spo12 NLS fused to GFP cloned into <i>LEU2 2μ</i> multicopy plasmid under <i>TP11</i> promoter   | Chaves and Blobel, 2001 |
| pSW173                        | <i>nup116ΔGLFG</i> cloned into pRS314 ( <i>TRP1 CEN</i> single copy)                             | Iovine et al., 1995     |
| pSW176                        | <i>NUP116</i> cloned into pRS314 ( <i>TRP1 CEN</i> single copy)                                  | Iovine et al., 1995     |
| pSW273                        | <i>nup116SfxFG<sub>Nsp1</sub></i> cloned into pRS314 ( <i>TRP1 CEN</i> single copy)              | Iovine et al., 1995     |
| pSW287                        | <i>nup116SGLFG<sub>Nup100</sub></i> cloned into pRS314 ( <i>TRP1 CEN</i> single copy)            | Iovine et al., 1995     |
| pSW326                        | <i>nup116SGLFG<sub>Nup116</sub></i> cloned into pRS314 ( <i>TRP1 CEN</i> single copy)            | Iovine et al., 1995     |
| pSW4070                       | <i>GSP1</i> cloned ( <i>URA3 2 μ</i> multicopy) into under its own promoter                      | This study              |
| Rpl25NLS-EGFP                 | Rpl25 NLS fused to GFP cloned into pYX242 ( <i>LEU2 2μ</i> multicopy) under <i>TP11</i> promoter | Timney et al., 2006     |

## References

- Chaves, S.R., and G. Blobel. 2001. Nuclear import of Spo12p, a protein essential for meiosis. *J. Biol. Chem.* 276:17712–17717. <http://dx.doi.org/10.1074/jbc.M010760200>
- Giaever, G., A.M. Chu, L. Ni, C. Connelly, L. Riles, S. Véronneau, S. Dow, A. Lucau-Danila, K. Anderson, B. André, et al. 2002. Functional profiling of the *Saccharomyces cerevisiae* genome. *Nature*. 418:387–391. <http://dx.doi.org/10.1038/nature00935>
- Huh, W.-K., J.V. Falvo, L.C. Gerke, A.S. Carroll, R.W. Howson, J.S. Weissman, and E.K. O’Shea. 2003. Global analysis of protein localization in budding yeast. *Nature*. 425:686–691. <http://dx.doi.org/10.1038/nature02026>
- Iovine, M.K., J.L. Watkins, and S.R. Wentz. 1995. The GLFG repetitive region of the nucleoporin Nup116p interacts with Kap95p, an essential yeast nuclear import factor. *J. Cell Biol.* 131:1699–1713. <http://dx.doi.org/10.1083/jcb.131.6.1699>
- Oki, M., E. Noguchi, N. Hayashi, and T. Nishimoto. 1998. Nuclear protein import, but not mRNA export, is defective in all *Saccharomyces cerevisiae* mutants that produce temperature-sensitive forms of the Ran GTPase homologue Gsp1p. *Mol. Gen. Genet.* 257:624–634. <http://dx.doi.org/10.1007/s004380050690>
- Seedorf, M., and P.A. Silver. 1997. Importin/karyopherin protein family members required for mRNA export from the nucleus. *Proc. Natl. Acad. Sci. USA.* 94:8590–8595. <http://dx.doi.org/10.1073/pnas.94.16.8590>
- Shulga, N., P. Roberts, Z. Gu, L. Spitz, M.M. Tabb, M. Nomura, and D.S. Goldfarb. 1996. In vivo nuclear transport kinetics in *Saccharomyces cerevisiae*: a role for heat shock protein 70 during targeting and translocation. *J. Cell Biol.* 135:329–339. <http://dx.doi.org/10.1083/jcb.135.2.329>
- Strawn, L.A., T. Shen, N. Shulga, D.S. Goldfarb, and S.R. Wentz. 2004. Minimal nuclear pore complexes define FG repeat domains essential for transport. *Nat. Cell Biol.* 6:197–206. <http://dx.doi.org/10.1038/ncb1097>
- Timney, B.L., J. Tetenbaum-Novatt, D.S. Agate, R. Williams, W. Zhang, B.T. Chait, and M.P. Rout. 2006. Simple kinetic relationships and nonspecific competition govern nuclear import rates in vivo. *J. Cell Biol.* 175:579–593. <http://dx.doi.org/10.1083/jcb.200608141>
- Winston, F., C. Dollard, and S.L. Ricupero-Hovasse. 1995. Construction of a set of convenient *Saccharomyces cerevisiae* strains that are isogenic to S288C. *Yeast.* 11:53–55. <http://dx.doi.org/10.1002/yea.320110107>
